# Supplementary material
Source: PubMed Central journal article supplement (PMC3246389)
Supplement: NIHMS336795-supplement-supplement_1.pdf [file NIHMS336795-supplement-supplement_1.pdf]

## Quantitation of Membrane-Ligand Interactions Using Backscattering Interferometry

Michael M. Baksh,<sup>a</sup> Amanda Kussrow,<sup>c</sup> Mauro Mileni,<sup>b</sup> M.G. Finn,<sup>a\*</sup> Darryl Bornhop<sup>c\*</sup>

<sup>a</sup>Department of Chemistry, <sup>b</sup>Department of Molecular Biology, The Scripps Research Institute, 10550 N. Torrey Pines Rd., La Jolla, CA 92037

<sup>c</sup>Department of Chemistry and Vanderbilt Institute for Chemical Biology, Vanderbilt University, 4226 Stevenson Center, Nashville, TN 37235

### Supplementary Information

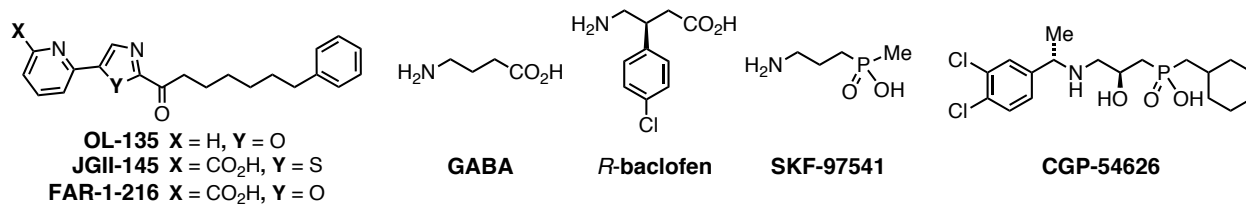

**Supplementary Figure 1.** Structures of small molecule ligands used in this work.

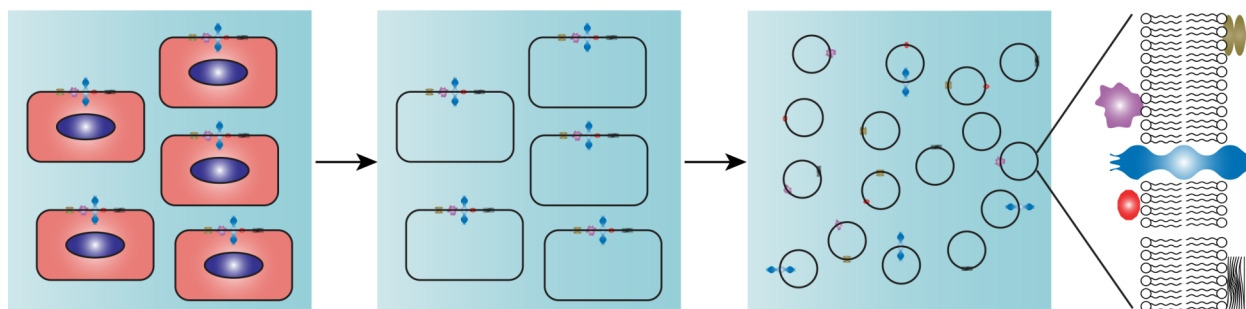

**Supplementary Figure 2.** Preparation of native membrane vesicles. Cells were incubated in a hypotonic solution, gently lysed, and the internal components separated from the outer membranes by centrifugation. Outer membranes were then sonicated and centrifuged to create a uniform population of SUV's containing native proteins. See references S1 and S2 for similar procedures.

**Supplementary Figure 3.** Western Blot of native cell membrane-derived SUV's stained for the presence of the GABA<sub>b</sub> receptor. Lanes 1-2, derived from b12.2-transformed cells; lanes 3-5, derived from CHO-K1 cells, lanes 3 and 6, bovine serum albumin.

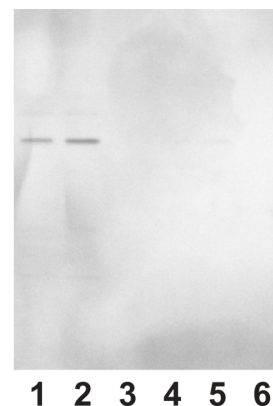

**Table 1.** Binding constants determined by BSI from the plots shown in Figure 2, including references to previous measurements.

| Membrane-bound binding partner | Solution-phase ligand   | $K_d$ (BSI) <sup>a</sup>                                    | Literature value and reference                                            |
|--------------------------------|-------------------------|-------------------------------------------------------------|---------------------------------------------------------------------------|
| GM1                            | Cholera toxin B subunit | $0.13 \pm 0.03$ nM                                          | $K_D = 4$ pM, ref. S3 <sup>b</sup><br>$K_D = 20$ nM, ref. S4 <sup>c</sup> |
| FAAH                           | OL-135                  | $0.26 \pm 0.04$ nM (pH 7.4)<br>$13 \pm 7.6$ pM (pH 9.0)     | $K_i = 4.7$ nM, ref. S5                                                   |
| FAAH                           | FAR-I-216               | $0.13 \pm 0.02$ nM (pH 7.4)<br>$0.10 \pm 0.03$ nM (pH 9.0)  | $K_i = 20$ nM, ref. S6                                                    |
| FAAH                           | JG-II-145               | $4.1 \pm 1.7$ $\mu$ M (pH 7.4)<br>$310 \pm 170$ nM (pH 9.0) | $K_i = 10$ $\mu$ M, ref. S7                                               |
| CXCR4                          | SDF-1 $\alpha$          | $0.69 \pm 0.33$ nM                                          | $IC_{50} = 1.8$ nM, ref. S8 <sup>d</sup>                                  |
| GABA <sub>B</sub> receptor     | GABA                    | $140 \pm 65$ nM                                             | $IC_{50} = 140$ nM, ref. S9 <sup>e</sup>                                  |
| GABA <sub>B</sub> receptor     | Baclofen                | $210 \pm 34$ nM                                             | $IC_{50} = 210, 250$ nM, ref. S9, S10 <sup>e</sup>                        |
| GABA <sub>B</sub> receptor     | SKF-97541               | $20 \pm 7.1$ nM                                             | $IC_{50} = 66$ nM, ref. S10 <sup>e</sup>                                  |
| GABA <sub>B</sub> receptor     | CGP-54626               | $5.4 \pm 1.7$ nM                                            | $IC_{50} = 2.2$ nM, ref. S9 <sup>e</sup>                                  |

(a) Error limits are derived from the statistical error of curve fitting the curves shown in Figure 2. (b) Determined by SPR. (c) Determined by fluorescence microscopy. (d) Determined by radioligand displacement on human T-lymphoblasts. (e) Determined by radioligand displacement on rat cerebral cortex extracts.

### Other Label-Free Methods

The most common type of label-free measurement made on unmodified biological molecules is the optical study of intrinsically fluorescent substrates or binders, such as proteins containing tryptophan residues at or near the site of action. This method provides a relatively narrow measurement window, since the majority of substrates of interest lack the good fortune to be naturally fluorescent. Cell-based assays, such as CellKey (MDS Analytical Technologies),<sup>S11</sup> EPIC (Corning),<sup>S12</sup> xCELLigence (Roche),<sup>S13</sup> and BIND (SRU Biosystems)<sup>S14</sup> provide indirect measurements of membrane “interaction constants”. Typically, impedance or waveguide interferometry-type measurements form the basis for such techniques, with the end observation being a change in cell phenotype (resistance to electrical current, morphology, etc.) after analytes of interest are added to cultures. While extremely sensitive, especially when combined with top-end image analysis, such techniques do not directly probe specific molecular interactions; further experiments, usually label-based, are required to directly relate observed morphology changes with target-ligand interactions. Surface plasmon resonance (SPR) and related techniques are popular and effective<sup>S15</sup> but require the immobilization of the membrane and its constituents onto the plasmonic support,<sup>S16</sup> which may or may not be conducive to replicating a native membrane environment. Bulk-phase techniques such as isothermal

titration calorimetry can allow correlation of molecular solute interactions with enthalpic changes, however this class of techniques generally requires relatively greater amounts of reactants, has low dynamic range, and a need for precise buffer matching; conditions often unfeasible in experiments involving complex matrices.

### **Disconnection between Binding ( $K_d$ ) and Inhibition ( $K_i$ )**

Although these parameters go by different names, at least three reports have appeared for diverse proteins in which  $K_d$  and  $K_i$  differ by three orders of magnitude or more.<sup>S17-S19</sup> (This is approximately the difference in magnitude in these parameters observed here for FAAH, comparing BSI results to inhibition constants reported in the literature.)

### **SUP-T1 cells**

These cells<sup>S20</sup> were provided as kind gift of the Torbett laboratory (The Scripps Research Institute). The negative control cell line (designated X4 -/-) were identical except for the suppression of CXCR4 levels using a specific zinc finger nuclease.<sup>S21</sup>

### **References**

- S1. Schwach, G. & Passow, H. *Preparation and properties of erythrocyte ghosts*. Mol. Cell. Biochem., 1973. **2**: 197-218.
- S2. Tanaka, M., Wong, A. P., Rehfeldt, F., Tutus, M. & Kaufmann, S. *Selective Deposition of Native Cell Membranes on Biocompatible Micropatterns*. J. Am. Chem. Soc., 2004. **126**: 3257-3260.
- S3. Kuziemko, G.M., M. Stroh, and R.C. Stevens, *Cholera Toxin Binding Affinity and Specificity for Gangliosides Determined by Surface Plasmon Resonance*. Biochemistry, 1996. **35**(20): p. 6375-6384.
- S4. Fang, Y., A. Frutos, and J. Lahiri, *Ganglioside Microarrays for Toxin Detection*. Langmuir, 2003. **19**: p. 1500.
- S5. Boger, D.L., et al., *Discovery of a potent, selective, and efficacious class of reversible alpha-ketoheterocycle inhibitors of fatty acid amide hydrolase effective as analgesics*. J. Med. Chem., 2005. **48**(6): p. 1849-1856.
- S6. Romero, F.A., et al., *Potent and selective alpha-ketoheterocycle-based inhibitors of the anandamide and oleamide catabolizing enzyme, fatty acid amide hydrolase*. J. Med. Chem., 2007. **50**(5): p. 1058-1068.
- S7. Garfinkle, J., et al., *Optimization of the Central Heterocycle of alpha-Ketoheterocycle Inhibitors of Fatty Acid Amide Hydrolase*. J. Med. Chem., 2008. **51**(15): p. 4392-4403.
- S8. Burns, J.M., et al. *A novel chemokine receptor for SDF-1 and I-TAC involved in cell survival, cell adhesion, and tumor development*. J. Exper. Med., 2006. **203**(9): p. 2201-2213.
- S9. Kaupmann, K., et al., *Expression cloning of GABAB receptors uncovers similarity to metabotropic glutamate receptors*. Nature, 1997. **386**(6622): p. 239-246.
- S10. Froestl, W., et al., *Phosphinic Acid Analogs of GABA. 1. New Potent and Selective GABA<sub>B</sub> Agonists*. J. Med. Chem., 1995. **38**(17): p. 3297-3312.
- S11. Clambrone, G.J., et al., *Cellular Dielectric Spectroscopy: A Powerful New Approach to Label-Free Cellular Analysis*. J. Biomol. Screening, 2004. **9**(6): p. 467-480.

S12. See application note at:

[http://www.nature.com/app\\_notes/nmeth/2007/072703/full/an2390.html](http://www.nature.com/app_notes/nmeth/2007/072703/full/an2390.html)

- S13. Atienza, J.M., et al., *Dynamic and label-free cell-based assays using the real-time cell electronic sensing system*. *Assay Drug Devel. Technol.*, 2006. **4**(5): p. 597-607.
- S14. Cunningham, B., et al., *Colorimetric resonant reflection as a direct biochemical assay technique*. *Sens. Actuators B*, 2002. **81**: p. 316-328.
- S15. (a) Alves, I.D., C.K. Park, and V.J. Hruby, *Plasmon resonance methods in GPCR signaling and other membrane events*. *Curr. Prot. Peptide Sci.*, 2005. **6**(4): p. 293-312. (b) Williams, T.L. and A.T.A. Jenkins, *Measurement of the Binding of Cholera Toxin to GM1 Gangliosides on Solid Supported Lipid Bilayer Vesicles and Inhibition by Europium (III) Chloride*. *J. Am. Chem. Soc.*, 2008. **130**(20): p. 6438-6443.
- S16. (a) Komolov, K.E., et al., *Surface plasmon resonance study of G protein/receptor coupling in a lipid bilayer-free system*. *Anal. Chem.*, 2006. **78**(4): p. 1228-1234. (b) Karlsson, O.P. and S. Lofas, *Flow-mediated on-surface reconstitution of G-protein coupled receptors for applications in surface plasmon resonance biosensors*. *Anal. Biochem.*, 2002. **300**(2): p. 132-138. (c) Galush, W.J., et al., *A Nanocube Plasmonic Sensor for Molecular Binding on Membrane Surfaces*. *Nano Lett.*, 2009. **9**(5): p. 2077-2082.
- S17. Taylor, P. & Lappi, S. *Interaction of Fluorescence Probes with Acetylcholinesterase. The Site and Specificity of Propidium Binding*. *Biochemistry*, 1975. **14**:1989-1997.
- S18. Lam, P. Y. S., Jahdavi, P. K., Eyermann, C. J., Hodge, C. N., Ru, Y., Bacheler, L. T., Meek, J. L., Otto, M. J., Rayner, M. M., Wong, Y. N., Chang, C.-H., Weber, P. C., Jackson, D. A., Sharpe, T. R. & Erickson-Vitanen, S. *Rational Design of Potent, Bioavailable, Nonpeptide Cyclic Ureas as HIV Protease Inhibitors*. *Science*, 1994. **263**: 380-384.
- S19. Prusakiewicz, J. J., Duggan, K. C., Rouzer, C. A. & Marnett, L. J. *Differential Sensitivity and Mechanism of Inhibition of COX-2 Oxygenation of Arachidonic Acid and 2-Arachidonoylglycerol by Ibuprofen and Mefenamic Acid*. *Biochemistry*, 2009. **48**: 7353-7355.
- S20. (a) Coffield, V.M., Jiant, Q., and Su, L. *A Genetic Approach to Inactivating Chemokine Receptors using a Modified Viral Protein*. *Nat. Biotech.*, 2003. **21**: 1321-1327. (b) Hesselgesser, J., et al. *Identification and Characterization of the CXCR4 Chemokine Receptor in Human T Cell Lines: Ligand Binding, Biological Activity, and HIV-1 Infectivity*. *J. Immunol.*, 1998. **160**: 877-883.
- S21. (a) Miller, J. C., et al. *An improved zinc-finger nuclease architecture for highly specific genome editing*. *Nat. Biotech.*, 2007. **25**: 778-785. (b) Perez, E. E., et al. *Establishment of HIV-1 resistance in CD4+ T cells by genome editing using zinc-finger nucleases*. *Nat. Biotech.*, 2008. **26**: 808-817. (c) Del Prete, G. Q., et al. *Derivation and Characterization of a Simian Immunodeficiency Virus SIVmac239 Variant with Tropism for CXCR4*. *J. Virol.*, 2009. **83**: 9911-9922.
